# Supplementary material for: Regulation of infant gut microbiota and metabolic pathways by human milk oligosaccharides: a multi-omics investigation
Source: Royal Society of Chemistry journal article supplement (doi:10.1039/d5ra08644b), 2026-01-01
Supplement: d5ra08644b1.pdf [file d5ra08644b1.pdf]

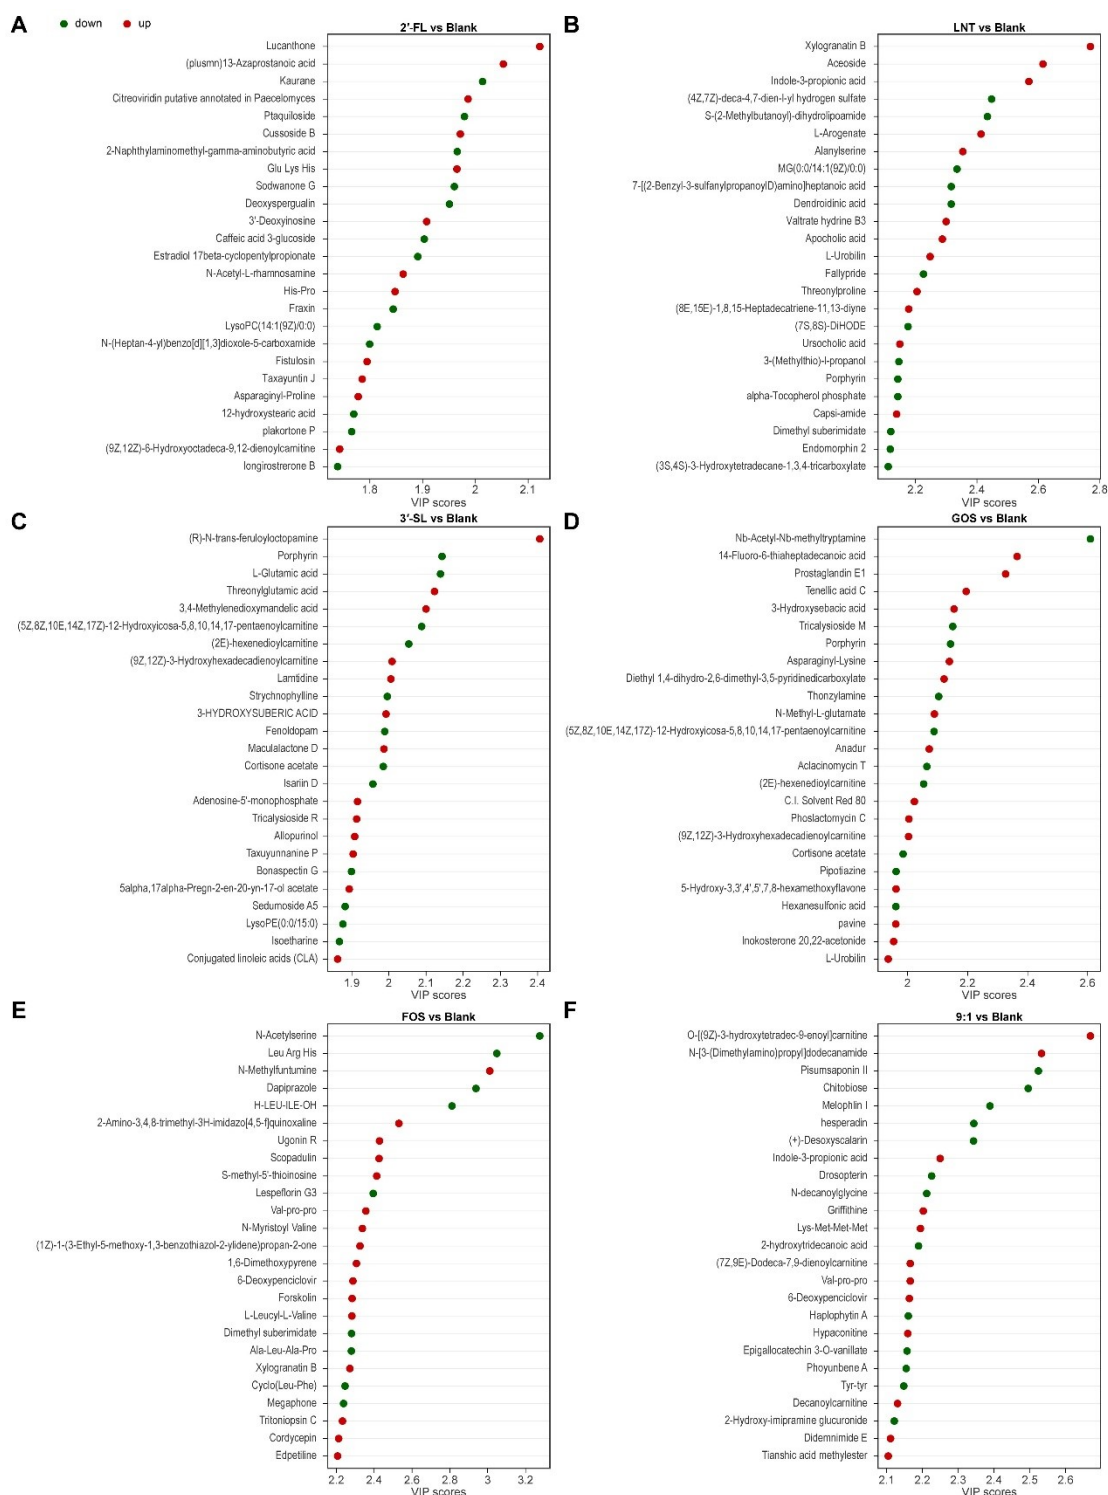

**Supplementary Figure S1.** VIP values of differential metabolites (Top 25). (A) 2'-FL vs. Blank. (B) LNT vs. Blank. (C) 3'-SL vs. Blank. (D) GOS vs. Blank. (E) FOS vs. Blank. (F) 9:1 vs. Blank.

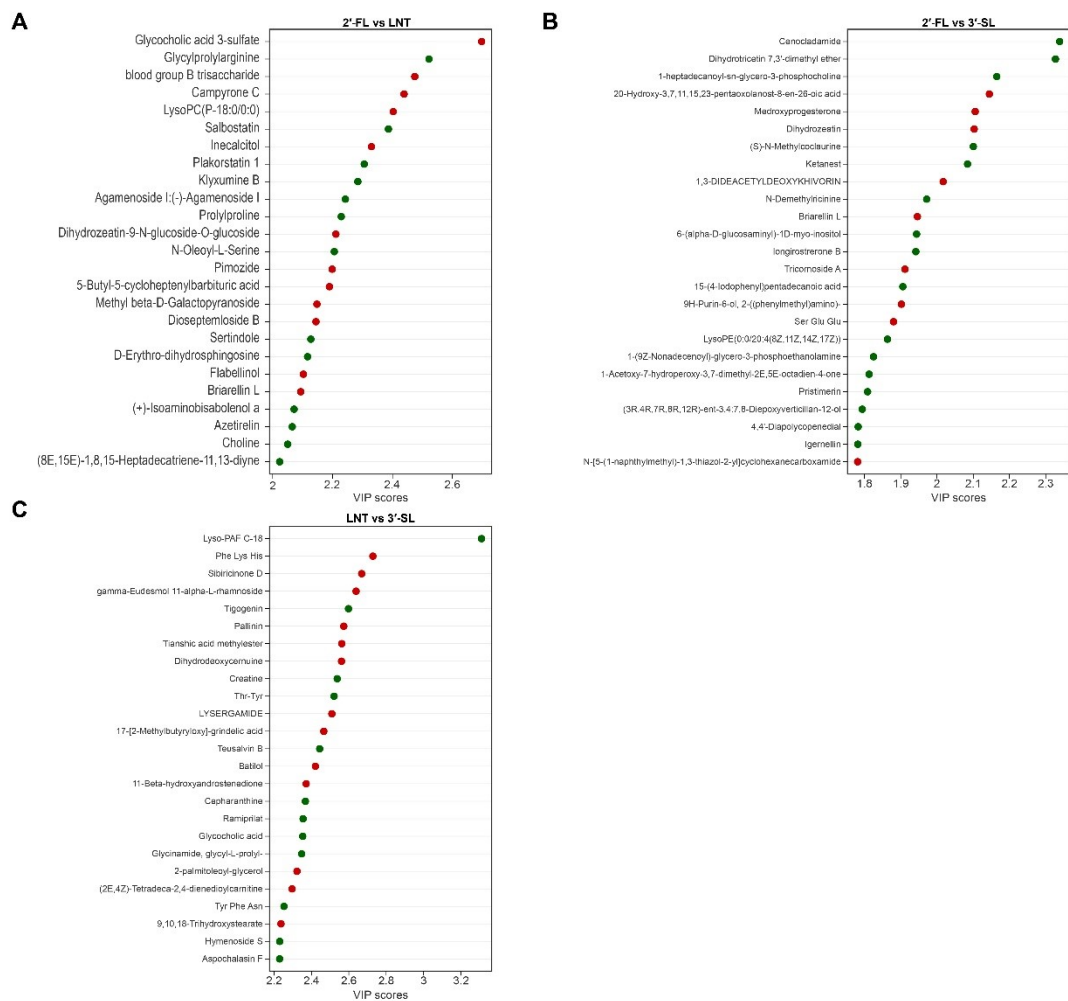

**Supplementary Figure S2.** VIP values of differential metabolites (Top 25). (A) 2'-FL vs. LNT. (B) 2'-FL vs. 3'-SL. (C) LNT vs. 3'-SL.
